# Supplementary material
Source: MDPI journal article supplement (https://www.mdpi.com/2073-4433/10/9/509)
Supplement: s1 [file s1]

# SWAT-based runoff simulation and runoff responses to climate change in the headwaters of the Yellow River, China

Jingwen Wu<sup>1</sup>, Haiyan Zheng<sup>1,\*</sup>, Yang Xi<sup>1</sup>

<sup>1</sup> State Key Laboratory of Earth Surface Processes and Resource Ecology, Faculty of Geographical Science, Beijing Normal University, Beijing 100875, China

## Contents of this file

Figures S1

## Introduction

This supplemental information section includes the Figure S1, which shows long-term temporal trend of mean basin precipitation and temperature during 1960–2012 across the headwater region of yellow river.

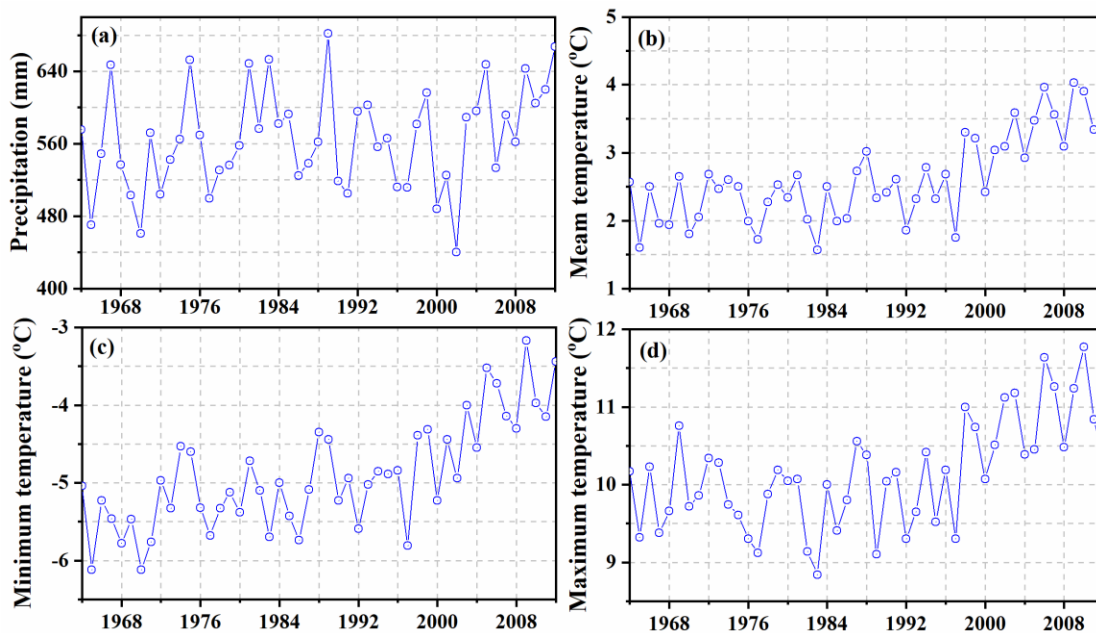

**Figure S1.** Long-term temporal trend of mean basin precipitation and temperature during 1960–2012 across the headwater region of yellow river.
